# Supplementary material
Source: HighWire-hosted journal article supplement (https://clinchem.aaccjnls.org/content/suppl/2012/10/05/58.7.1086)
Supplement: Jul12_Case_Esp_CXD.pdf [file Jul12_Case_Esp_CXD.pdf]

## Un varón de 24 años de edad previamente diagnosticado con hemofilia

Francesca Khani<sup>1,2\*</sup> y Mikhail Roshal<sup>2</sup>

### CASO

Un varón de 24 años de edad del Oriente Medio diagnosticado con hemofilia a la edad de 4 o 5 años se presentó a la clínica de hematología para un seguimiento después de una reciente hospitalización por sangrado excesivo debido a un corte accidental con un cuchillo. El paciente refirió antecedentes de sangrados prolongados después de extracciones de dientes, una hemorragia digestiva alta tres años antes y edemas excesivos desde la infancia. Negó hemartrosis pero notificó dolor crónico en los tobillos y articulaciones. El paciente relató haber sido tratado durante los episodios de hemorragias excesivas con plasma fresco congelado (FFP)<sup>3</sup> y factor VIII mientras estuvo hospitalizado. Debido a la poca continuidad de cuidado, su enfermedad no había sido controlada o tratada de forma ambulatoria regularmente. Es importante destacar, como parte de los antecedentes familiares, que los padres del paciente eran primos consanguíneos (en primer grado) y que una de sus hermanas también ha experimentado hemorragias excesivas, aunque su diagnóstico era incierto. Los resultados iniciales de laboratorio dieron un recuento sanguíneo normal y completo, que incluyen plaquetas, un tiempo parcial y prolongado de tromboplastina activado (aPTT) y un tiempo prolongado de protrombina (PT) (Tabla 1). La actividad de fibrinógeno era normal. Una mezcla de 1 a 1 de plasma del paciente y plasma normal demostró una completa corrección del PT y el aPTT, un resultado que coincide con la deficiencia de factor.

### DISCUSIÓN

#### DATOS ADICIONALES DEL PACIENTE Y DIAGNÓSTICO

##### DIFERENCIAL

Los pacientes con hemofilia aislada A, B o C (causada por deficiencias en los factores VIII, IX y XI respectiva-

#### PREGUNTAS A CONSIDERAR

1. ¿Cómo difieren los estudios de coagulación para este paciente de aquellos que se observan típicamente en pacientes con hemofilia?
2. ¿Cuáles son las causas posibles del tiempo prolongado de PT y aPTT simultáneamente?
3. ¿Qué estudios de coagulación posteriores recomienda usted para la evaluación de este paciente?

mente) o deficiencia del factor VIII ocasionada por la enfermedad de Von Willebrand, típicamente tienen un aPTT prolongado pero un PT normal. En la ausencia de terapia de anticoagulación o sospecha de deficiencia de vitamina K, una PT prolongada en un estudio inicial en estos pacientes puede levantar la sospecha de un trastorno hemorrágico de una etiología diferente. Dados los síntomas clínicos de hemorragias notables del paciente desde la infancia, debió considerarse un trastorno genético. El diagnóstico diferencial incluye disfibrinogenemia, deficiencia de protrombina, deficiencia de factor V, deficiencia combinada de los factores V y VIII (F5F8D), deficiencia del factor X y deficiencia hereditaria, combinada de factores de la coagulación, dependientes de la vitamina K. Todas estas afecciones presentan la prolongación tanto del PT como el aPTT (1). Dados los resultados de los estudios mezclados, posteriormente evaluamos la actividad de los factores (Tabla 1).

Los resultados de estudios de coagulación adicionales sugieren convincentemente un diagnóstico de F5F8D, debido a que las actividades de los factores V y VIII habían disminuido marcadamente. También la actividad del factor VII parecía estar ligeramente incrementada, pero este hallazgo fue considerado, sin embargo, como una consecuencia clínica. La F5F8D es una afección genética que por lo general se diagnostica erróneamente como una enfermedad causada por la deficiencia de un solo factor, tal como la hemofilia A, particularmente en instituciones con recursos limitados de diagnóstico en hematología (2). El patrón hereditario y la patogénesis de estas dos afecciones genéticas son distintas y son importantes para determinar la terapia y la asesoría genética. Este escenario resalta la

<sup>1</sup> New York Presbyterian Hospital, New York, NY; <sup>2</sup> Weill Cornell Medical College, New York, NY.

\* Dirigir correspondencia a los autores a: New York Presbyterian Hospital, 525 E. 68th St., ST10-32 New York, NY 10065. Fax 212-746-8545; e-mail frk9007@nyp.org. Recibido para publicación: abril 6 de 2011. Aceptado para publicación: julio 13 de 2011.

<sup>3</sup> Abreviaturas no estándar: FFP, plasma fresco congelado; aPTT, tiempo parcial de tromboplastina activado; PT, tiempo de protrombina; F5F8D, deficiencia combinada de los factores V y VIII.

**Tabla 1. Resultados de laboratorio del paciente (citrato de plasma).**

|                                       | Resultado | Intervalo de Referencia |
|---------------------------------------|-----------|-------------------------|
| <b>aPTT</b>                           |           |                         |
| Paciente                              | 70.6      | 22.5–31.3               |
| Plasma Normal                         | 26.3      | 22.5–31.3               |
| Mezcla (1 a 1)                        | 29.3      | 22.5–31.3               |
| <b>PT</b>                             |           |                         |
| Paciente                              | 19.2      | 9.4–11.5                |
| Plasma normal                         | 10.7      | 9.4–11.5                |
| Mezcla (1 a 1)                        | 11.5      | 9.4–11.5                |
| <b>Actividad de los Factores, %</b>   |           |                         |
| FII                                   | 139       | 69–140                  |
| FV                                    | 5         | 70–154                  |
| FVII                                  | 145       | 72–131                  |
| FVIII                                 | 4         | 56–172                  |
| FIX                                   | 113       | 69–176                  |
| Factor von Willebrand                 | 59        | 50–125                  |
| Antígeno del factor von Willebrand, % | 81        | ≥50                     |
| Fibrinógeno, mg/dL (μmol/L)           | 308 (9.0) | 180–400 (5.3–11.8)      |

importancia de más investigación en el laboratorio cuando las pruebas iniciales parecen no coincidir con el supuesto diagnóstico del paciente.

En la cascada de coagulación, los factores V y VIII son cofactores de glicoproteína para la activación proteolítica de protrombina (factor II) por el factor X, y del Factor X por el factor IX, respectivamente. Por tanto, son esenciales para la formación de coágulos. La F5F8D es un raro trastorno autosómico recesivo en el que las concentraciones de plasma de los factores V y VIII han disminuido, por tanto se producen síntomas de hemorragia excesiva. La incidencia de esta afección es aproximadamente de 1 en 1 000 000 en la población general, pero según se informa es más prevalente en los Judíos del Oriente Medio y en las poblaciones no Judías de Irán. En estas poblaciones se calcula una incidencia de 1 en 100 000. Se piensa que el grado mayor de consanguineidad en estas poblaciones explica parcialmente la mayor prevalencia de este trastorno autosómico recesivo (3).

La F5F8D se distingue genéticamente de las deficiencias aisladas hereditarias del factor VIII (hemofilia A) y el factor V (parahemofilia). Aunque es posible tener hemofilia A y una deficiencia concurrente del factor V, tal combinación es mucho menos probable dados los distintos patrones hereditarios de las 2 afecciones. También es importante considerar los ante-

cedentes familiares. Ya que este paciente también tiene una hermana con un trastorno hemorrágico similar, es poco probable que sea hemofilia A, porque afecta solo a los varones debido a su asociación hereditaria con el cromosoma X, en su etiología (3). Clínicamente, los pacientes con hemofilia A presentan una infancia similar a aquellos con F5F8D: fácil formación de hematomas, sangrado de la nariz, sangrado severo después de procedimientos quirúrgicos, extracciones dentales y trauma. La menorragia y hemorragia post-parto son comunes en mujeres afectadas (1). La deficiencia del factor V autosómico recesivo, que también se presenta en la infancia y es asociada a la consanguineidad parental, se presenta con la fácil formación de hematomas, sangrado de la nariz y de la membrana mucosa, particularmente dentro de la cavidad oral; (1). Se observan con menor frecuencia hemartrosis, hematomas en músculos y sangrado espontáneo en pacientes con deficiencia del factor V y en aquellos con F5F8D, comparados con pacientes con hemofilia A severa (1). La severidad de hemorragias en pacientes con F5F8D es similar últimamente a la experimentada por pacientes con niveles similares de deficiencia de estos factores aislados (4). Los resultados de los estudios de coagulación, la presentación clínica y los antecedentes familiares del paciente descrito en este caso indican que el diagnóstico más probable es F5F8D. Las pruebas genéticas moleculares pueden ser requeridas para confirmar absolutamente este diagnóstico. Para el propósito de diagnóstico y tratamiento, sin embargo, son suficientes los estudios de los factores V y VIII (2).

Actualmente, se cree que las mutaciones en los 2 genes: LMAN1<sup>4</sup> (enlace lecitina, manosa, 1) y MCFD2 (deficiencia múltiple del factor de coagulación 2), explican todos los casos de F5F8D. LMAN1 y MCFD2 codifican proteínas que forman un complejo dependiente de calcio esencial para transportar los factores V y VIII desde el retículo endoplásmico al aparato de Golgi en vesículas cubiertas por revestimiento de proteína II (Fig.1). De manera interesante, los factores V y VIII solo son proteínas de carga que se sabe afectan a pacientes con F5F8D. Si se afecta el transporte de otras proteínas de carga, la deficiencia probablemente no sea lo suficientemente grande para producir un fenotipo clínico (2, 5).

#### MANEJO CLÍNICO

Como en la mayoría de los trastornos hemorrágicos, las directrices del manejo clínico de la F5F8D están dictadas en relación con la gravedad de la enfermedad. En la

<sup>4</sup> Genes Humanos: LMAN1, lecitina, manosa-enlazante, 1; MCFD2, deficiencia múltiple de factor de coagulación 2.

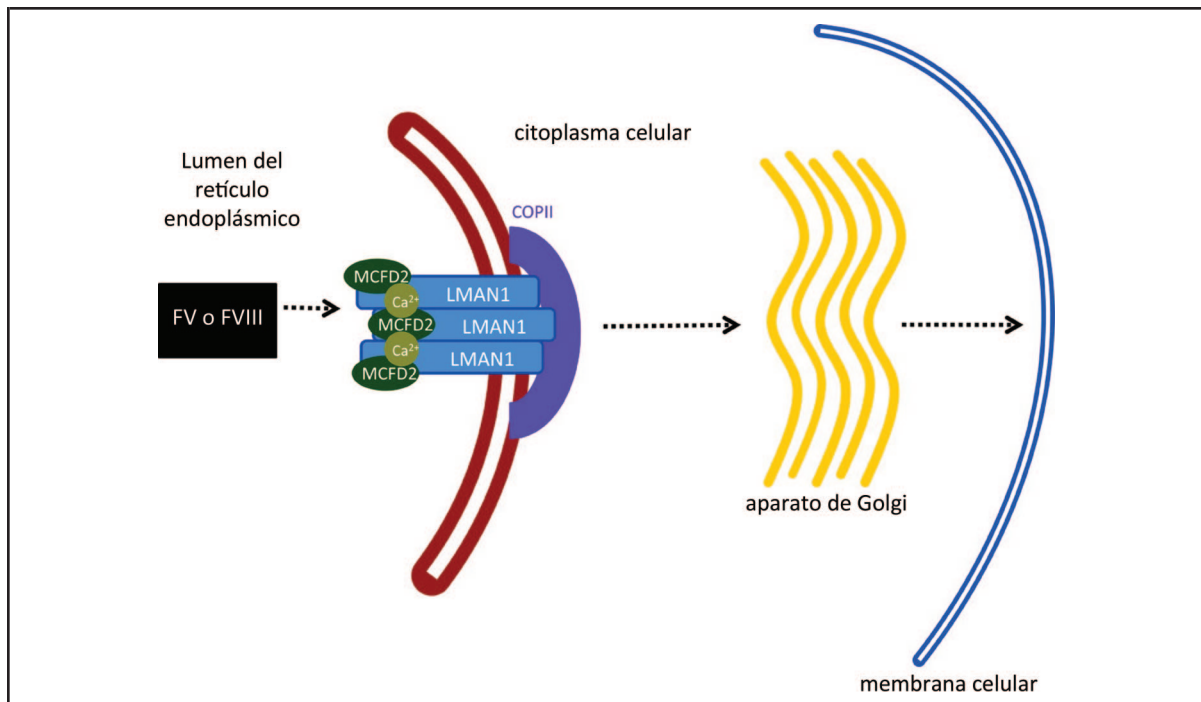

**Figura 1.** Ilustración del transporte del factor V (FV) y del factor VIII (FVIII) del retículo endoplásmico al aparato de Golgi, facilitado por el complejo LMAN1-MCFD2 dependiente de calcio.

El FV y FVIII dejan el retículo endoplásmico en vesículas cubiertas de la proteína de revestimiento II (COPII) y son modificadas posteriormente en el aparato de Golgi antes de dejar la célula.

F5F8D, tanto la naturaleza de la hemorragia como las actividades de los factores V y VIII se utilizan para guiar la terapia. La profilaxis regular no es necesaria generalmente hasta que el paciente tiene hematomas y hemartrosis recurrentes y severos (2). Para episodios menores de sangrado, la actividad del factor VIII deberá incrementarse de un 30 a 50% de lo normal; para episodios hemorrágicos más severos, la actividad del factor VIII deberá incrementarse del 50 al 70%. Para episodios de hemorragia en general, la actividad del factor V deberá incrementarse al 25% (1). Se requieren fuentes de ambos factores para lograr una hemostasis adecuada. Debido a que no se dispone de ningún concentrado de factor V actualmente, el FFP es el único producto disponible para reemplazar el factor V. Aunque el FFP teóricamente puede ser usado para reemplazar ambos factores, es importante recordar que los factores V y VIII difieren en cuanto a las concentraciones recomendadas, necesarias para la hemostasis y tienen diferente vida media de plasma (36 h para el factor V y 10 a 14 h para el factor VIII) (5). Por tanto, al reemplazar el factor VIII con FFP solamente podría necesitarse mayor exposición considerable a productos sanguíneos. Las concentraciones del factor VIII pueden ser usadas para suplementar el FFP y alcanzar un factor

## PUNTOS PARA RECORDAR

- Las historias clínica y los antecedentes familiares de pacientes con anomalías hemorrágicas son extremadamente importantes en la evaluación de trastornos hereditarios de coagulación.
- Se necesita investigación de laboratorio cuando se suponen diagnósticos, antecedentes familiares y los resultados iniciales de estudios de laboratorio no coinciden.
- Aun cuando es raro, debe sospecharse que se trata de F5F8D en pacientes que parecen tener hemofilia y tienen PT y aPTT prolongados, particularmente si tienen herencia del Medio Oriente y/o tienen antecedentes familiares de consanguinidad. Es por tanto, necesario incluir los factores V y VIII en las pruebas para deficiencias de factor inexplicables en los estudios de prolongación de PT y aPTT.
- En pacientes con F5F8D y durante un episodio grave de hemorragia, se necesitan reemplazar los factores V y VIII. El FFP debe ser proporcionado para reemplazar el factor V ya que no hay otra fuente disponible actualmente.

adecuado de concentración de VIII. Hay numerosos tipos de concentrados de factor VIII disponibles y se distribuyen para uso de pacientes con hemofilia A. Se ha encontrado que el desmopresin es útil para episodios de hemorragia menor en F5F8D ya que incrementa la concentración del factor VIII (6). Los pacientes que se someten a procedimientos quirúrgicos requieren de una terapia profiláctica apropiada; la administración de concentrados del factor VIII cada 12 h para mantener la actividad del factor VIII en >50%, y FFP cada 12 h para lograr la actividad del factor V a <25%, hasta que se curen las heridas (1).

**Contribuciones de autor:** Todos los autores confirmaron que han contribuido al contenido intelectual de este documento y han cumplido con los siguientes 3 requisitos: (a) contribuciones significativas para la concepción, diseño, adquisición de datos o análisis e interpretación de estos; (b) redacción o revisión del artículo en cuanto a su contenido intelectual; y (c) aprobación final del artículo publicado.

## Comentario

Elizabeth M. Van Cott\*

Este caso resalta la importancia de confirmar el diagnóstico cuando se atiende a un paciente por primera vez con un supuesto caso de hemofilia. Si los informes originales de laboratorio no están disponibles, se sugiere que se repitan las pruebas. Primero, es importante asegurarse qué factor está bajo (VIII, IX u XI). Hubo un caso en otra oportunidad en el que un paciente nuevo con hemofilia recibió concentrado de factor VIII por un episodio hemorrágico y que en realidad tenía hemofilia B (deficiencia del factor IX). Segundo, los laboratorios deben probar los factores en diluciones múltiples para excluir un inhibidor (ej., lupus anticoagulante, heparina o inhibidor directo de trombina). Por ejemplo, un paciente con un diagnóstico de hemofilia C (deficiencia del factor XI), que se había mudado de otro estado, fue atendido en mi institución. Nuestras pruebas revelaron, sin embargo, que solo la dilución de 1 a 10 (1 volumen de muestra en 9 de diluyente) mostraba una baja actividad del factor XI y la actividad del factor XI incrementada con una dilución, tal

**Declaración de los autores de posibles conflictos de interés:** Ningún autor declaró algún posible conflicto de interés.

## Referencias

1. Bolton-Maggs PHB, Perry DJ, Chalmers EA, Parapia LA, Wilde JT, Williams MD, et al. The rare coagulation disorders—review with guidelines for management from the United Kingdom Haemophilia Centre Doctors' Organization (Los extraños trastornos de coagulación, revisión con directrices de manejo de la Organización de Médicos del Centro de Hemofilia del Reino Unido). *Haemophilia* 2004; 10:593–628.
2. Zhang B. Recent developments in the understanding of the combined deficiency of FV and FVIII (Desarrollos recientes acerca de la comprensión de la deficiencia combinada de FV y FVIII). *Br J Haematol* 2009; 145:15–23.
3. Spreafico M, Peyvandi F. Combined FV and FVIII deficiency (Deficiencia combinada de FV y FVIII). *Haemophilia* 2008; 14:1201–8.
4. Peyvandi F, Tuddenham EG, Akhtari AM, Lak M, Mannucci PM. Bleeding symptoms in 27 Iranian patients with the combined deficiency of factor V and factor VII. (Síntomas hemorrágicos en 27 pacientes iraníes con la deficiencia combinada de los factores V y VII). *Br J Haematol* 1998; 100:773–6.
5. Spreafico M, Peyvandi F. Combined factor V and factor VIII deficiency (Deficiencia combinada de los factores V y VIII). *Semin Thromb Hemost* 2009; 35:390–9.
6. Mannucci PM, Duga S, Peyvandi F. Recessively inherited coagulation disorders (Trastornos de coagulación recesivos y hereditarios). *Blood* 2004; 104:1243–52.

como la de 1 a 40 (1 volumen de muestra en 39 de diluyente) lograba una actividad normal del factor XI. Descubrimos que el paciente tenía un lupus anticoagulante que interfería en el ensayo del factor XI, lo que causaba una falsa reducción en la actividad de dicho factor. Durante 20 años, previos a estas pruebas, había recibido plasma congelado y fresco en forma previa a operaciones, y el riesgo de trombo por lupus anticoagulante no había sido detectado.

Si el factor VIII es bajo, deben considerarse otras entidades antes de diagnosticar hemofilia A. El factor VIII es lábil y puede bajar falsamente si la muestra tiene coágulos, ha sido conservada como sangre completa en hielo o ha sido congelada varias veces. La coagulación intravascular diseminada puede consumir factor VIII. La enfermedad de von Willebrand, cuando es lo suficientemente grave, causa disminución del factor VIII. De manera importante, el resultado del factor normal de von Willebrand no excluye la enfermedad de von Willebrand 2N, que se caracteriza por una actividad del factor VIII del 5 al 40% de lo normal, debido a un factor de mutación de von Willebrand que impacta su habilidad para unir y proteger al factor VIII. La enfermedad tipo 2N de von Willebrand puede distinguirse de la hemofilia A por el patrón hereditario (autosómico vs ligado al cromosoma X, respectivamente) o, si es necesario, mediante un ensayo de unión del factor VIII o a

Massachusetts General Hospital, Boston, MA.

\* Dirigir correspondencia al autor a: GRJ 235, Massachusetts General Hospital, 55 Fruit St., Boston, MA 02114.

Recibido para publicación: septiembre 7 de 2011. Aceptado para publicación: septiembre 8 de 2011.

través de pruebas genéticas en un laboratorio de referencia. Como se muestra en este caso, es importante que los tiempos de protrombina y de tromboplastina parcial activada también sean evaluados para detectar otras causas de la baja actividad del factor VIII, tal como las deficiencias combinadas de factores V y VIII, muestras coaguladas o congelación intravascular diseminada.

El enfoque más eficiente es iniciar con la medición del tiempo de protrombina y del tiempo parcial activado de tromboplastina en un laboratorio que realice reflexivamente estudios mezclados,

ensayos de factor y/o prueba de lupus anticoagulante, como se indica.

---

**Contribuciones de autor:** Todos los autores confirmaron que han contribuido al contenido intelectual de este documento y han cumplido con los siguientes 3 requisitos: (a) contribuciones significativas para la concepción y diseño, adquisición de datos o análisis e interpretación de estos; (b) redacción o revisión del artículo en cuanto a su contenido intelectual; y (c) aprobación final del artículo publicado.

**Declaración de los autores de posibles conflictos de interés:** Ningún autor declaró algún posible conflicto de interés.

### Comentario

James N. Huang\*

Khani y Roshal describen a un paciente cuyo diagnóstico de deficiencias combinadas de los factores V y VIII fue detectado cerca de 20 años después de que el paciente fue diagnosticado con “hemofilia”. Una clave para el diagnóstico correcto es que tanto el tiempo de protrombina (PT) como el tiempo parcial de tromboplastina activado (aPTT) eran prolongados. Aunque hablamos constantemente de estas pruebas como ensayos para dos cascadas bioquímicas separadas, estas cascadas no reflejan la formación de coágulos in vivo. Más bien, con daño de vasos, el factor tisular se expone junto con el factor VIIa y forman un complejo para generar protrombinasa (compuesta de calcio, fosfolípidos y factores X y V activados), lo que activa la protrombinasa en trombina, y entonces genera fibrina de fibrinógeno. La presencia del inhibidor de la vía del factor tisular rápidamente reduce el estallido inicial de la trombina, pero la presencia de suficiente trombina compromete un circuito de retroalimentación, con activación del factor XI, que ayuda a generar tenasa (compuesta de calcio, fosfolípido y factores activados IX y VIII), lo que conduce a la formación de más protrombina. El requerimiento secuencial de estos complejos de enzimas y la presencia de circuitos de retroalimentación in vivo no proporcionan una razón a priori para que el PT o el aPTT sean específicos para un subgrupo de reacciones. En cambio, es útil para

conocer, como en toda prueba de laboratorio clínico, las especificidades y sensibilidades de cada prueba cuando se interpretan los resultados del PT y el aPTT. El PT es sensible a deficiencias en las concentraciones de los factores II, V, VII y X pero es relativamente insensible a las concentraciones de VIII, IX y XI. En contraste, el aPTT es sensible a concentraciones bajas de los factores VIII, IX y XI y a las deficiencias de los factores de contacto o la presencia de anticuerpos antifosfolípidos o inhibidores de trombina. En un paciente con prolongación de PT y aPTT, uno debe considerar deficiencias de factores combinados (desde deficiencia de vitamina K, coagulación intravascular diseminada o deficiencias combinadas de los factores V y VIII) o la presencia de procesos múltiples (deficiencia de factor además de anticuerpos antifosfolípido, por ejemplo).

---

**Contribuciones de autor:** Todos los autores confirmaron que han contribuido al contenido intelectual de este documento y han cumplido con los siguientes 3 requerimientos: (a) contribuciones significativas para la concepción y diseño, adquisición o análisis e interpretación de datos; (b) redacción o revisión del artículo en cuanto a su contenido intelectual; y (c) aprobación final del artículo publicado.

**Declaración de los autores de posibles conflictos de interés:** En relación al manuscrito, todos los autores elaboraron la forma de deslinde de autor: Deslindes y/o posibles conflictos de interés:

**Empleo o liderazgo** No se declara.

**Papel del consultor o asesor:** J.N. Huang, Zone One Parma and Biogen Idec Hemophilia.

**Propiedad:** No se declara.

**Honorarios:** No se declara.

**Fuentes de investigación:** No se declara.

**Testimonio de expertos:** No se declara.

---

University of California San Francisco School of Medicine, San Francisco, CA.

\* Dirigir correspondencia al autor a: University of California San Francisco School of Medicine, 505 Parnassus Ave., Box 0106, San Francisco, CA 94143. E-mail huangj@peds.ucsf.edu.

Recibido para publicación: abril 16 de 2012. Aceptado para publicación: abril 18 de 2012.
